# Supplementary material
Source: publisher site journal article supplement (https://www.dovepress.com/article/480525)
Supplement: Supplementary file 1 [file get_supplementary_file.php]

# Supplementary materials

**Supplementary Table 1** Data Quality Indicators and Derivation Rules

| DQI | Derivation rules | |
| --- | --- | --- |
| **Total No. of Patients/Records Included in Calculation of the DQI (Denominator in Count Data)** | Derivation for the DQI (Numerator in Count Data) |
| **Representativeness** | | |
| DQI 1; sex | Number of patients in the study | Number of males and females unknown |
| DQI 2; age at MS onset | Number of patients according to age category (<18, 18–29, 30–34, 35–39, 40–44, 45–49, 50–54, 55–59, and ≥60 years), unknown age at MS onset |
| DQI 3; age at MS diagnosis | Number of patients according to age category (<18, 18–29, 30–34, 35–39, 40–44, 45–49, 50–54, 55–59, and ≥60 years), unknown age at MS diagnosis |
| DQI 4; MS clinical course at inclusion | Number of patients with RRMS, SPMS, PPMS, PRMS, and other unknown |
| DQI 5; number of previous MS treatments | Number of patients with 0, 1, 2, or ≥3 previous MS treatments, unknown number of previous MS treatments |
| **Consistency** | | |
| DQI 1; patients with no visit/recording during past year at the date of data cut-off | Number of patients with a follow-up duration ≥1 year at the date of data cut-off | Number of patients with no visit/recording in the past year at the date of data cut-off |
| DQI 2; patients with no visit/recording during past 2 years at the date of data cut-off | Number of patients with a follow-up duration ≥2 years at the date of data cut-off | Number of patients with no visit/recording in the past 2 years at the date of data cut-off |
| DQI 3; patients with less than 1 visit per year, on average, during follow-up | Number of patients with a follow-up duration ≥1 year at the date of data cut-off | Number of patients with <1 visit per year, on average, during follow-up |
| DQI 4; number of recorded lymphocyte count measurements, per patient, per year, during follow-up (categorical) | Number of patients with a follow-up duration ≥1 year at the date of data cut-off and with patient-level data | Average number of recorded lymphocyte count measurements per patient, per year, during follow-up (categorical) |
| **Accuracy** | | |
| DQI 1; patients with discrepant MS onset date | Number of patients with a non-missing MS onset date | Number of patients with a discrepant MS onset date |
| DQI 2; patients with discrepant MS diagnosis date | Number of patients with a non-missing MS diagnosis date | Number of patients with a discrepant MS diagnosis date |
| DQI 3; patients with discrepant MS treatment stop date | Number of patients in the study population | Number of patients with a discrepant (overlap) MS treatment stop date |
| DQI 4; patients with discrepant study treatment stop date (cladribine cohort) | Number of patients in the cladribine cohort who switched to another treatment during follow-up | Number of patients with a discrepant (overlap) cladribine treatment stop date, based on cladribine stop date and switched treatment start date |
| DQI 5; patients with discrepant study treatment stop date (fingolimod cohort) | Number of patients in the fingolimod cohort who switched to another treatment during follow-up | Number of patients with a discrepant (overlap) fingolimod treatment stop date, based on fingolimod stop date and switched treatment start date |
| DQI 6; AESI records with discrepant stop date | Number of AESI records with AESI start date ≥ index date and with a non-missing AESI stop date | Number of AESIs with a discrepant AESI stop date |
| DQI 7; patients with duplicate MS treatment recording | Number of patients in the study with MS treatment | Number of patients with duplicate MS treatments |
| **Completeness** | | |
| DQI 1; records of MS treatment with missing start date (only day missing, month and day missing, completely missing) | Number of MS treatment records during follow-up | Number of MS treatment records with an incomplete/missing start date |
| DQI 2; records of AESI with incomplete details | Number of AESI records during follow-up | Number of AESI records with missing information in AE module |
| DQI 3; records of lymphocyte count with missing date (only day missing, month and day missing, completely missing) (cladribine cohort) | Number of lymphocyte count records during follow-up in the cladribine cohort | Number of lymphocyte count records with an incomplete/missing date in the cladribine cohort |
| DQI 4; patient lost to follow-up | Number of patients in the study | Number of patients lost to follow-up by year |
| DQI 5; records of severe lymphopenia with missing stop date | Number of severe lymphopenia records with start date during follow-up and status does not equal ongoing | Number of severe lymphopenia records with missing/incomplete stop date |
| DQI 6; records of MS treatment with missing stop date (only day missing, month and day missing, completely missing) | Number of MS treatment records during follow-up and status does not equal ongoing | Number of MS treatment records with an incomplete/missing stop date |
| DQI 7; records of missing reason for treatment discontinuation (cladribine cohort) | Number of records with cladribine treatment stop date | Number of records with missing reason for cladribine treatment discontinuation |
| DQI 8; records of missing reason for treatment discontinuation (fingolimod cohort) | Number of records with fingolimod treatment stop date | Number of records with missing reason for fingolimod treatment discontinuation |
| DQI 9; patients with missing birth date (only day missing, month and day missing, completely missing) | Number of patients in the study | Number of patients with an incomplete/missing birth date |
| DQI 10; patients with missing sex | Number of patients with missing sex |
| DQI 11; patients with missing MS onset date (only day missing, month and day missing, completely missing) | Number of patients with an incomplete/missing MS onset date |
| DQI 12; patients with missing MS diagnosis date (completely missing, month and day missing, only day missing) | Number of patients with an incomplete/missing MS diagnosis date |

**Abbreviations:** AE, adverse event; AESI, adverse events of special interest; DQI, data quality indicator; MS, multiple sclerosis; PPMS, primary progressive MS; PRMS, primary relapsing MS; RRMS, relapsing-remitting MS; SPMS, secondary progressive MS.

# Imputation algorithm for any partial multiple sclerosis treatment start dates

In case of any partial MS treatment start dates at baseline or during follow-up, imputation is performed as following:

1. If both month and day are missing for treatment start date, and it is possible to locate the end date of previous MS treatment AND the previous MS treatment end date > MS onset date (if MS onset date available as well), then impute start date with previous MS treatment end date + 1 day.
2. If only day is missing for treatment start date, and it is possible to locate the end date of previous MS treatment within the same calendar month AND the previous MS treatment end date > MS onset date (if MS onset date available as well), then impute start date with previous MS treatment end date + 1 day.
3. If only day is missing for treatment start date, and it is not possible to locate the end date of previous MS treatment within the same calendar month AND other MS treatment end date > MS onset date (if MS onset date available as well), then impute treatment start day with 01.
4. If day and/or month is missing for treatment start date, and there is no history of previous MS treatment AND treatment start date year does not equal MS diagnosis date year (if MS diagnosis date available) AND treatment start date year does not equal MS onset date year (if MS onset date available), then missing months will be replaced with January (1) and missing days will be replaced by 1.
5. If day and/or month is missing for treatment start date, and there is no history of previous MS treatment AND treatment start date year equals MS diagnosis date year (if MS diagnosis date available), then impute treatment start date with MS diagnosis date.
6. If day and/or month is missing for treatment start date, and there is no history of previous MS treatment AND treatment start date year equals MS onset date year (if MS onset date available), then impute treatment start date with MS onset date.
7. If there is no history of previous MS treatment, but either MS onset date and/or MS diagnosis is available, then impute treatment start date with MS onset date or MS diagnosis date, whichever is the later date.
